# Supplementary material for: Quantifying ice loss in the eastern Himalayas since 1974 using declassified spy satellite imagery
Source: Copernicus journal article supplement (doi:10.5194/tc-10-2203-2016), 2016-09-23
Supplement: Supplementary file 1 [file tc-10-2203-2016-supplement.pdf]

Supplement of The Cryosphere, 10, 2203–2215, 2016  
<http://www.the-cryosphere.net/10/2203/2016/>  
doi:10.5194/tc-10-2203-2016-supplement  
© Author(s) 2016. CC Attribution 3.0 License.

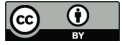

*Supplement of*

## **Quantifying ice loss in the eastern Himalayas since 1974 using declassified spy satellite imagery**

**Joshua M. Maurer et al.**

*Correspondence to:* Joshua M. Maurer ([jmaurer@ldeo.columbia.edu](mailto:jmaurer@ldeo.columbia.edu))

The copyright of individual parts of the supplement might differ from the CC-BY 3.0 licence.

Supplement

**Table S1. Vertical accuracy statistics<sup>a</sup> of Hexagon DEMs relative to the 2006 ASTER DEM (meters)**

| ID | Lon   | Lat <sup>b</sup> | RMSE <sub>z</sub> | Mean | Median | NMAD <sup>c</sup> | STD  | 68.3%Q | 95%Q |
|----|-------|------------------|-------------------|------|--------|-------------------|------|--------|------|
| 1  | 90.05 | 28.25            | 8.1               | 0.5  | 0.7    | 6.4               | 8.1  | 6.8    | 15.9 |
| 2  | 90.26 | 28.24            | 8.6               | 1.2  | 1.3    | 7.3               | 8.5  | 7.5    | 15.6 |
| 3  | 89.97 | 28.09            | 11.5              | 1.4  | 1.4    | 8.7               | 11.5 | 9.4    | 22.5 |
| 4  | 90.12 | 28.10            | 11.6              | 0.7  | 0.8    | 9.2               | 11.6 | 9.8    | 21.9 |
| 5  | 90.27 | 28.08            | 12.8              | 0.6  | 1.0    | 8.7               | 12.8 | 9.4    | 24.4 |
| 6  | 90.42 | 28.14            | 14.9              | 1.6  | 1.5    | 11.6              | 14.8 | 12.7   | 30.3 |
| 7  | 90.73 | 28.05            | 8.9               | 0.1  | 0.6    | 6.6               | 8.9  | 7.0    | 17.8 |
| 8  | 90.66 | 28.25            | 11.8              | 0.4  | 1.1    | 8.9               | 11.8 | 9.5    | 22.5 |

5 <sup>a</sup> Over assumed stable terrain (i.e. excluding glaciers). <sup>b</sup> Center of each Hexagon DEM region.  
<sup>c</sup> Normalized median absolute deviation. <sup>d</sup> Hole interpolation max area (km<sup>2</sup>).

Table S2. Glacier Change Statistics

| Glacier ID                                    | a            | b            | c            | d            | e            | f            | g            |
|-----------------------------------------------|--------------|--------------|--------------|--------------|--------------|--------------|--------------|
| Longitude (deg)                               | 89.99        | 90.04        | 90.25        | 89.99        | 90.07        | 90.15        | 90.21        |
| Latitude (deg)                                | 28.21        | 28.18        | 28.19        | 28.16        | 28.14        | 28.16        | 28.13        |
| Mean Elevation (m)                            | 5710         | 5712         | 6183         | 4940         | 4565         | 4853         | 5012         |
| 1974 Area (km <sup>2</sup> )                  | 13.4 ± 1.3   | 25.0 ± 2.5   | 86.2 ± 8.6   | 23.5 ± 2.3   | 8.8 ± 0.9    | 30.1 ± 3.0   | 5.4 ± 0.5    |
| $\Delta V$ (km <sup>3</sup> )                 | -0.08 ± 0.03 | -0.29 ± 0.07 | -0.26 ± 0.31 | -0.14 ± 0.06 | -0.09 ± 0.03 | -0.17 ± 0.09 | -0.03 ± 0.03 |
| $\Delta V_{\text{extrap}}$ (km <sup>3</sup> ) | -0.05 ± 0.03 | -0.27 ± 0.07 | 0.09 ± 0.31  | -0.20 ± 0.06 | -0.09 ± 0.03 | -0.18 ± 0.09 | -0.03 ± 0.03 |
| $\bar{h}$ (m)                                 | -5.6 ± 2.2   | -12.0 ± 3.2  | -3.0 ± 3.6   | -6.1 ± 2.5   | -10.3 ± 4.0  | -5.5 ± 2.9   | -5.2 ± 5.9   |
| $\dot{b}$ (m.w.e.)                            | -0.15 ± 0.06 | -0.32 ± 0.09 | -0.08 ± 0.10 | -0.16 ± 0.07 | -0.27 ± 0.11 | -0.15 ± 0.08 | -0.14 ± 0.16 |
| Data coverage (%)                             | 39           | 48           | 28           | 49           | 100          | 68           | 100          |
| Debris coverage (%)                           | 1            | 6            | 3            | 41           | 37           | 44           | 16           |
| Calving (y/n)                                 | n            | y            | n            | n            | n            | n            | y            |

  

| h            | i            | j            | k            | l            | m            | n            |
|--------------|--------------|--------------|--------------|--------------|--------------|--------------|
| 90.27        | 90.33        | 90.35        | 90.39        | 90.47        | 90.7         | 90.75        |
| 28.13        | 28.11        | 28.09        | 28.1         | 28.08        | 28.06        | 28.04        |
| 5486         | 5151         | 5154         | 5749         | 6133         | 5505         | 5450         |
| 13.8 ± 1.4   | 6.1 ± 0.6    | 5.0 ± 0.5    | 49.8 ± 5.0   | 29.7 ± 3.0   | 5.7 ± 0.6    | 9.2 ± 0.9    |
| -0.12 ± 0.08 | -0.10 ± 0.03 | -0.04 ± 0.02 | -0.52 ± 0.13 | -0.02 ± 0.13 | -0.02 ± 0.02 | -0.08 ± 0.03 |
| -0.16 ± 0.08 | -0.10 ± 0.03 | -0.08 ± 0.02 | -0.45 ± 0.13 | 0.07 ± 0.13  | -0.02 ± 0.02 | -0.09 ± 0.03 |
| -8.5 ± 5.7   | -18.3 ± 6.0  | -8.7 ± 4.8   | -10.7 ± 2.8  | -0.6 ± 4.3   | -4.4 ± 3.3   | -8.4 ± 3.1   |
| -0.23 ± 0.15 | -0.48 ± 0.16 | -0.23 ± 0.13 | -0.28 ± 0.08 | -0.02 ± 0.11 | -0.12 ± 0.09 | -0.22 ± 0.08 |
| 30           | 100          | 58           | 54           | 26           | 60           | 76           |
| 17           | 11           | 10           | 11           | 14           | 1            | 1            |
| y            | y            | n            | n            | n            | n            | y            |

  

| o            | p            | q            | r            | s            | t            | u            |
|--------------|--------------|--------------|--------------|--------------|--------------|--------------|
| 90.79        | 90.78        | 90.62        | 90.66        | 90.68        | 90.63        | 90.67        |
| 28.03        | 28.06        | 28.21        | 28.24        | 28.26        | 28.25        | 28.29        |
| 5216         | 5540         | 5342         | 5139         | 5304         | 6034         | 5602         |
| 5.7 ± 0.6    | 9.1 ± 0.9    | 3.1 ± 0.3    | 12.5 ± 1.3   | 6.5 ± 0.7    | 9.8 ± 1.0    | 10.2 ± 1.0   |
| -0.04 ± 0.02 | -0.09 ± 0.02 | -0.04 ± 0.02 | -0.11 ± 0.04 | -0.03 ± 0.03 | -0.03 ± 0.03 | -0.04 ± 0.03 |
| -0.07 ± 0.02 | -0.12 ± 0.02 | -0.04 ± 0.02 | -0.11 ± 0.04 | -0.03 ± 0.03 | -0.01 ± 0.03 | -0.05 ± 0.03 |
| -7.6 ± 3.4   | -10.1 ± 3.0  | -11.9 ± 6.4  | -9.1 ± 3.1   | -5.1 ± 4.4   | -3.2 ± 3.4   | -4.3 ± 2.9   |
| -0.20 ± 0.09 | -0.27 ± 0.08 | -0.32 ± 0.17 | -0.24 ± 0.09 | -0.13 ± 0.12 | -0.08 ± 0.09 | -0.11 ± 0.08 |
| 63           | 41           | 100          | 84           | 100          | 55           | 51           |
| 8            | 1            | 42           | 39           | 1            | 19           | 9            |
| n            | y            | n            | n            | n            | n            | n            |

$\Delta V$  is ice volume change without extrapolation,  $\Delta V_{\text{extrap}}$  is ice volume change after extrapolating missing data using regional data from individual elevation bands.  $\bar{h}$  is the spatially-averaged elevation change of the glacier, and  $\dot{b}$  is the geodetic mass balance for each glacier over the 32-year timespan.

Table S3

|                                                                                                              | clean        | debris       | calving      | all          |
|--------------------------------------------------------------------------------------------------------------|--------------|--------------|--------------|--------------|
| Area (km <sup>2</sup> )                                                                                      | 221 ± 11     | 78 ± 4       | 66 ± 3       | 365 ± 12     |
| Area (%)                                                                                                     | 61           | 21           | 18           |              |
| <b>Assuming zero change for missing data</b>                                                                 |              |              |              |              |
| $\Delta V$ (km <sup>3</sup> )                                                                                | -1.09 ± 0.4  | -0.55 ± 0.4  | -0.70 ± 0.3  | -2.34 ± 0.6  |
| $\Delta V$ (%)                                                                                               | 46           | 24           | 30           |              |
| $b'$ (m.w.e. yr <sup>-1</sup> )                                                                              | -0.13 ± 0.06 | -0.19 ± 0.11 | -0.28 ± 0.10 | -0.17 ± 0.05 |
| <b>Extrapolating missing data using regional profiles</b>                                                    |              |              |              |              |
| $\Delta V$ (km <sup>3</sup> )                                                                                | -0.60 ± 0.4  | -0.62 ± 0.4  | -0.77 ± 0.3  | -1.99 ± 0.6  |
| $\Delta V$ (%)                                                                                               | 30           | 31           | 39           |              |
| $b'$ (m.w.e. yr <sup>-1</sup> )                                                                              | -0.07 ± 0.06 | -0.21 ± 0.11 | -0.31 ± 0.10 | -0.14 ± 0.05 |
| <b>Assuming zero change for missing data in glacier c, extrapolating missing data for all other glaciers</b> |              |              |              |              |
| $\Delta V$ (km <sup>3</sup> )                                                                                | -0.95 ± 0.4  | -0.62 ± 0.4  | -0.77 ± 0.3  | -2.34 ± 0.6  |
| $\Delta V$ (%)                                                                                               | 41           | 26           | 33           |              |
| $b'$ (m.w.e. yr <sup>-1</sup> )                                                                              | -0.11 ± 0.06 | -0.21 ± 0.11 | -0.31 ± 0.10 | -0.17 ± 0.05 |

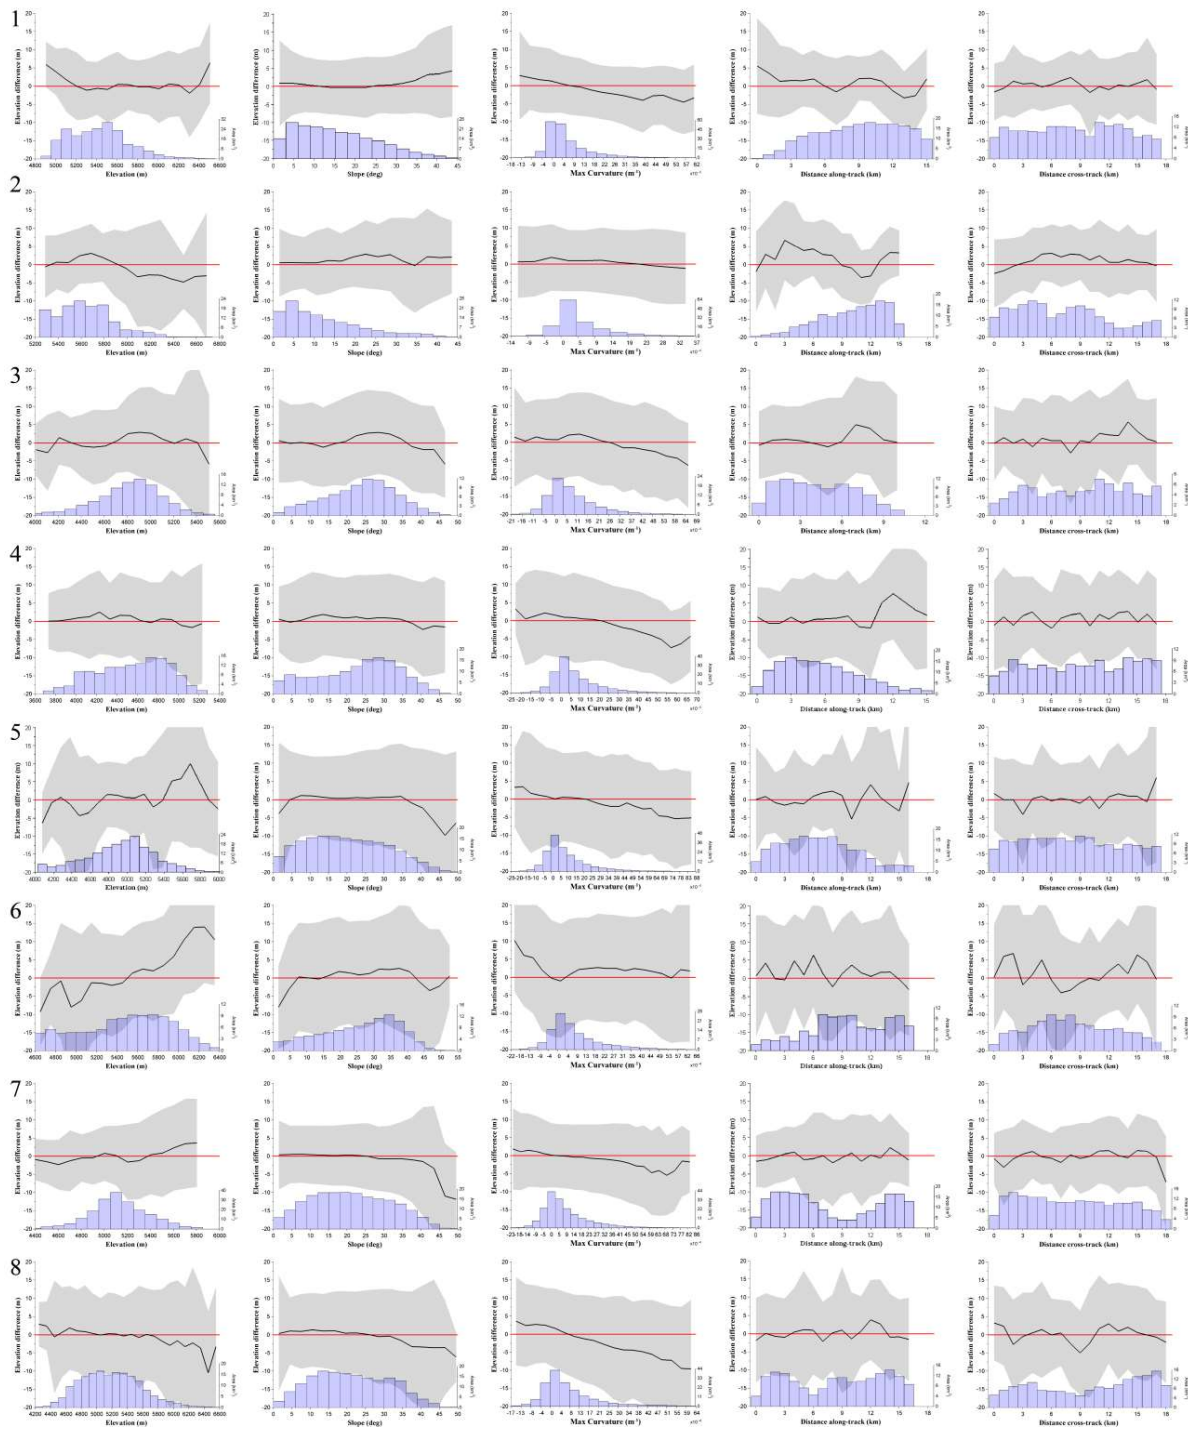

Figure S1. Plots of elevation change vs. elevation, slope, maximum curvature, and ASTER along-track and cross-track directions for assumed stable terrain in each of the 8 Hexagon DEM regions given in Table S1. Black curves and grey shaded regions indicate the mean and standard deviation of each bin, respectively. The area (km<sup>2</sup>) contained in each bin is indicated by the blue histogram bars, calculated as the number of pixels per bin \* pixel resolution<sup>2</sup>.

5

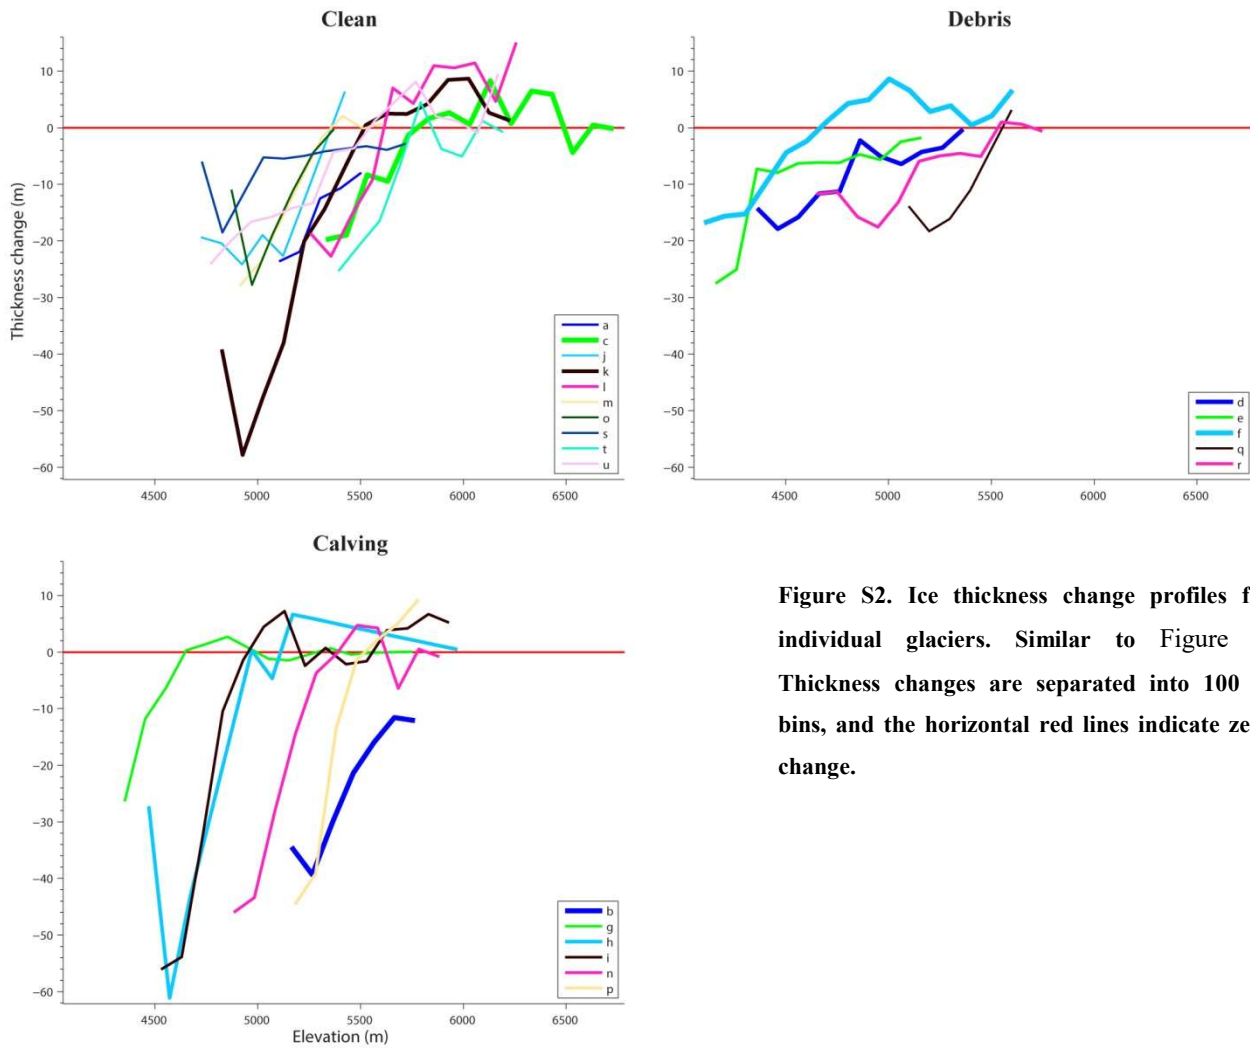

**Figure S2. Ice thickness change profiles for individual glaciers. Similar to Figure 4, Thickness changes are separated into 100 m bins, and the horizontal red lines indicate zero change.**

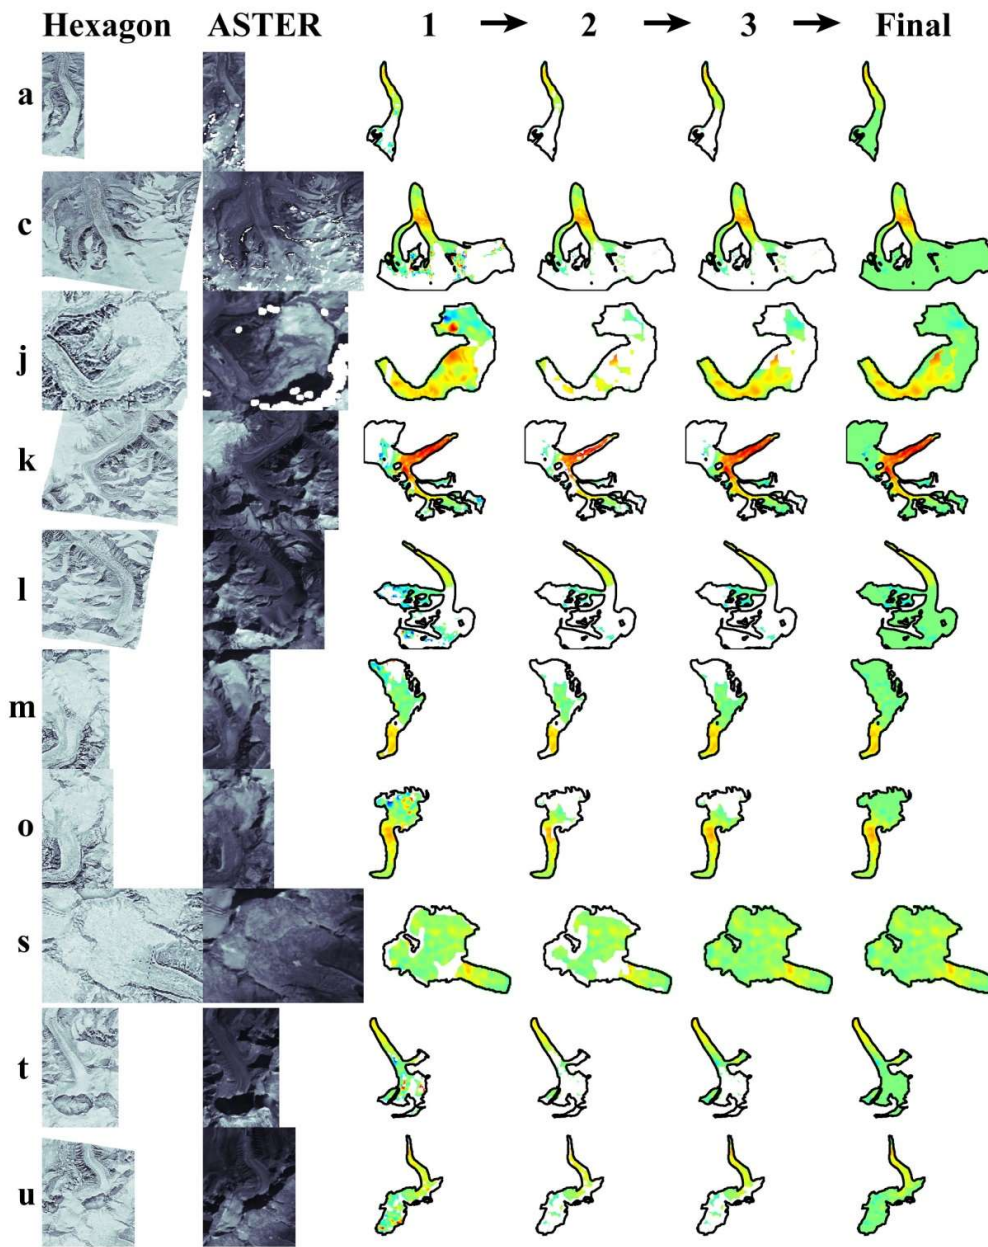

Figure S3. Hexagon and ASTER images, along with thickness change map processing stages for clean ice glaciers. Stage 1: raw elevation change maps; stage 2: after excluding erroneous pixels (see section 2.3), stage 3: after interpolating gaps smaller than 2 km<sup>2</sup>, and stage 4: after filling remaining accumulation zone gaps with zero elevation change.

5

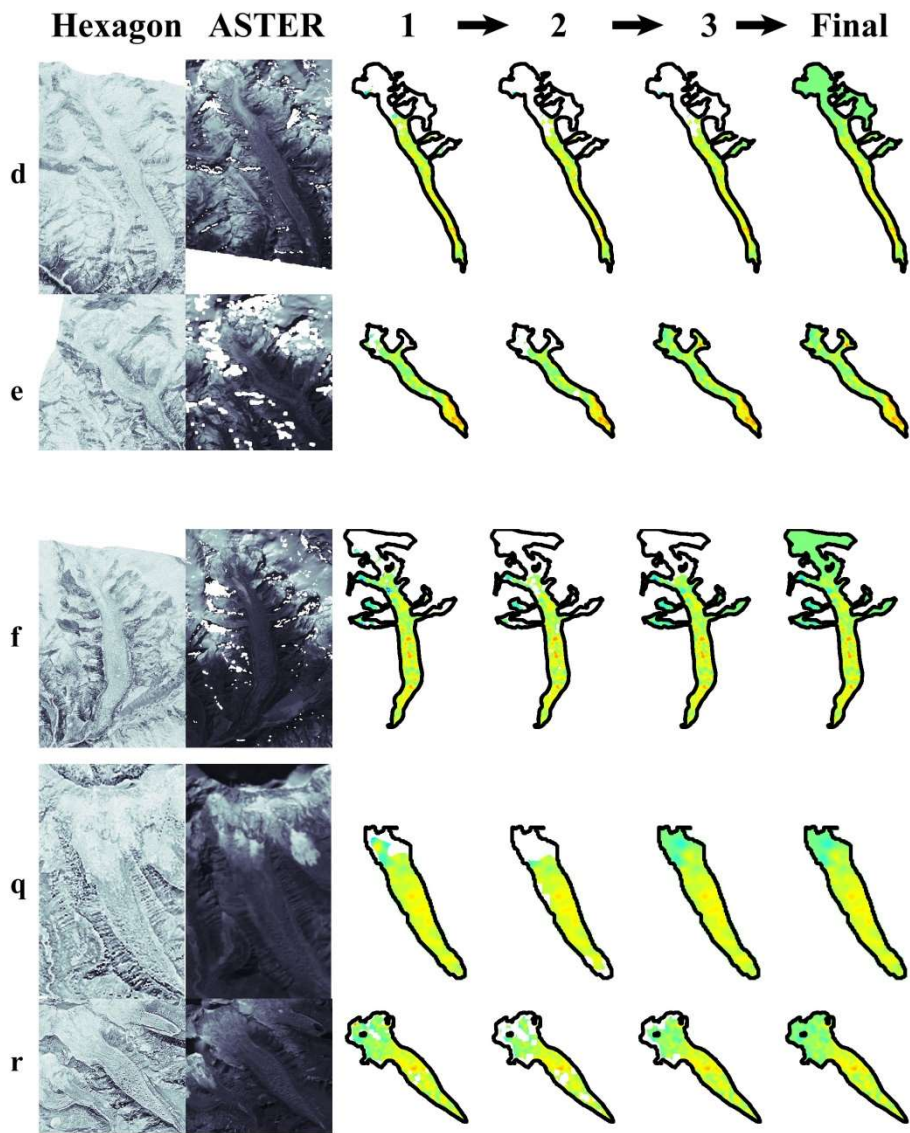

Figure S4. Same as Fig. S3, but for debris-covered glaciers.



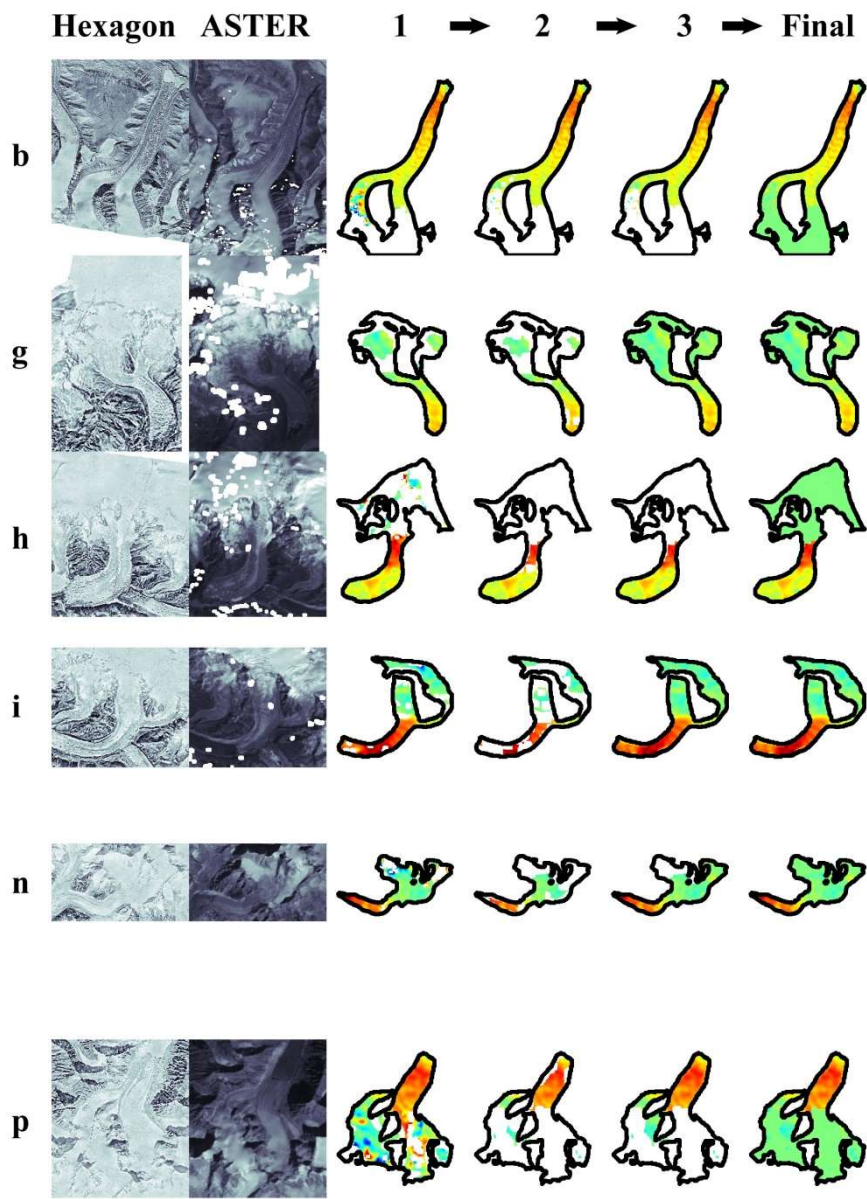

Figure S5. Same as Fig. S3, but for calving glaciers.

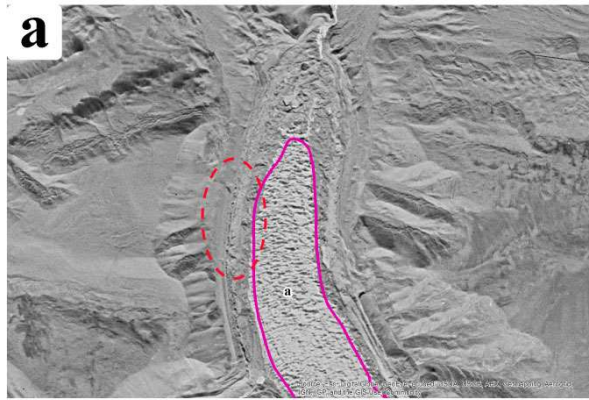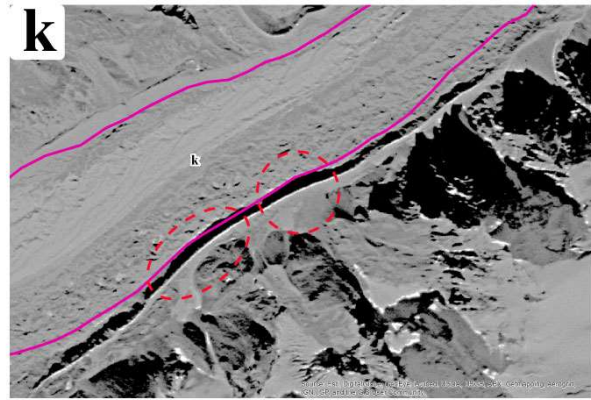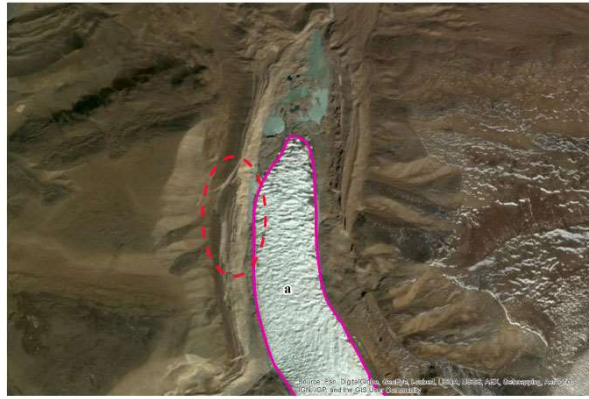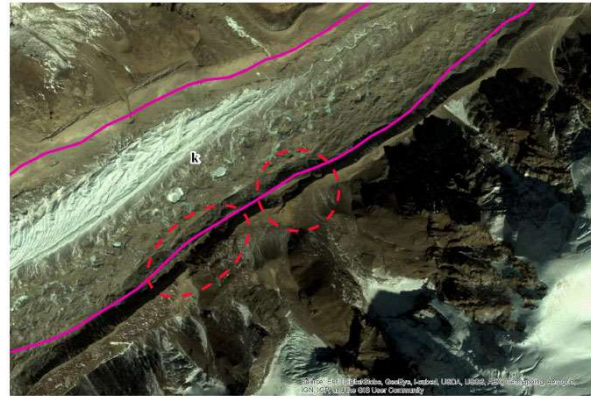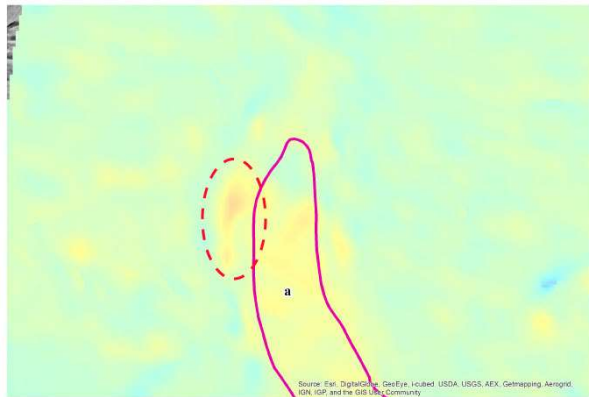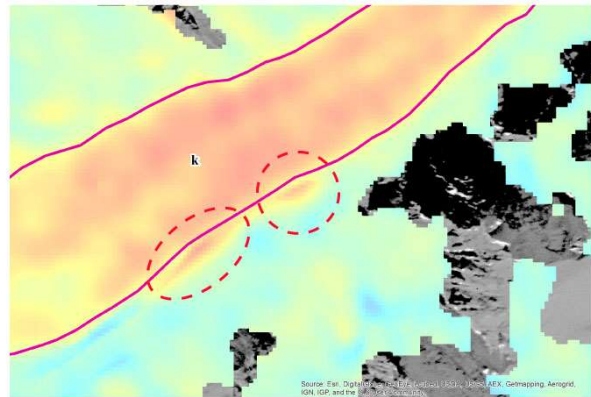

Figure S6. Two examples of unstable moraine ridges. Red dotted ellipses indicate sections which have collapsed near glaciers a and k.

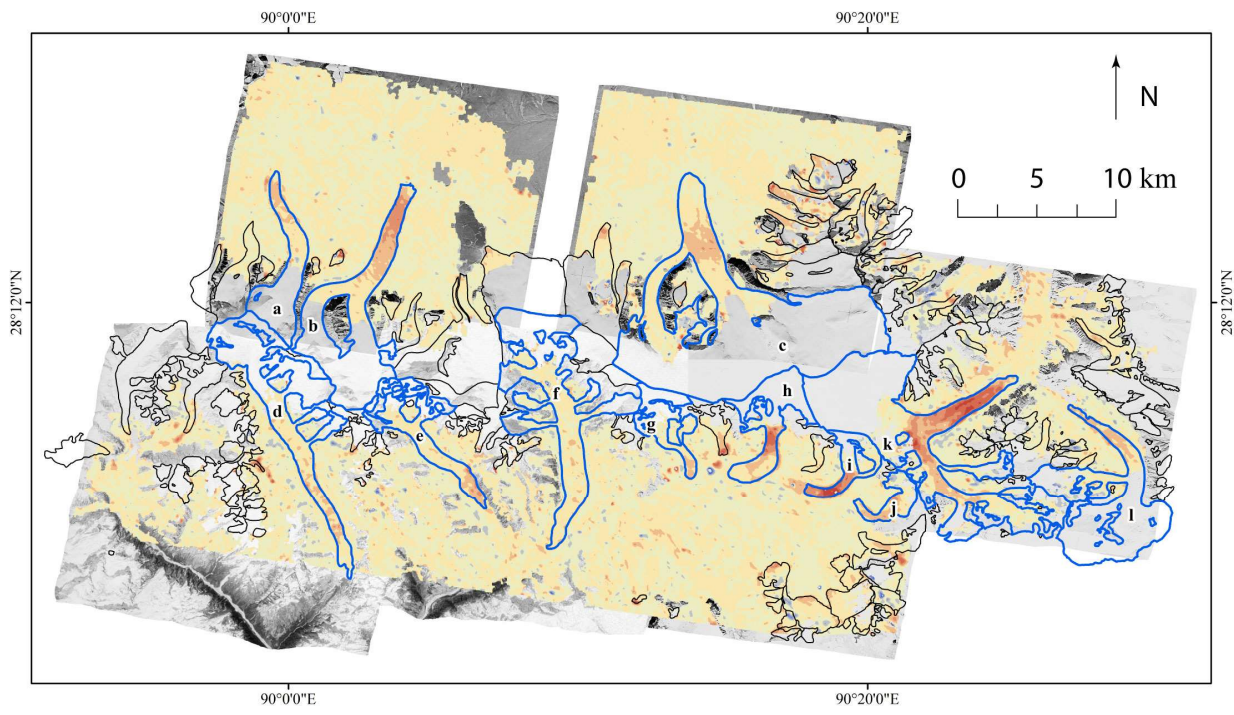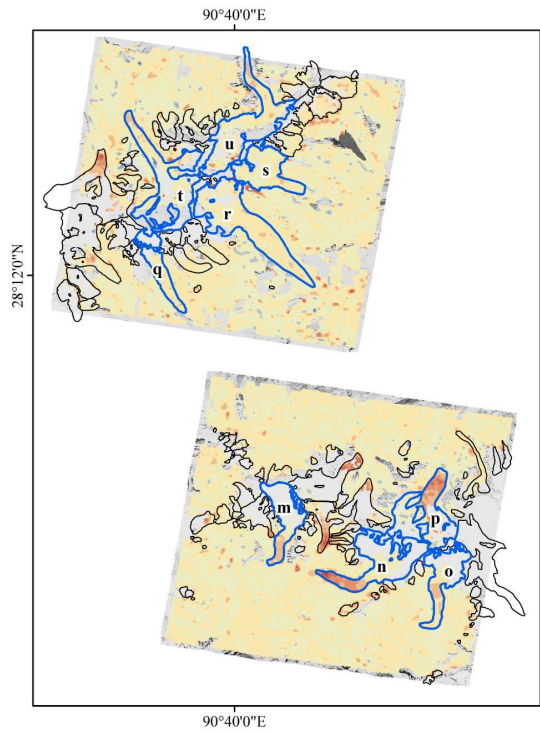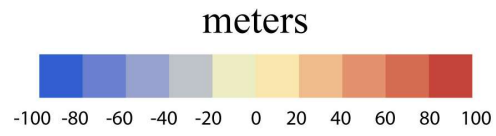

**Figure S7. Same as Fig. 3, except elevation changes are visualized as discrete classes rather than using continuous color coding.**
